# Supplementary material
Source: PubMed Central journal article supplement (PMC3408169)

**SUPPLEMENTAL FIGURE 1. Glycogen binding-competent laforin overexpression results in formation of LB-like structures** (lower magnification of FIGURE 5 in main paper). Top row, empty myc vector; second and third rows, glycogen binding competent wild-type and C265S myc-laforin; fourth and fifth rows, W32G and F83L myc-laforins that do not bind glycogen. Myc immunostaining, green; glycogen, red. Scale bars, 50  $\mu$ m.

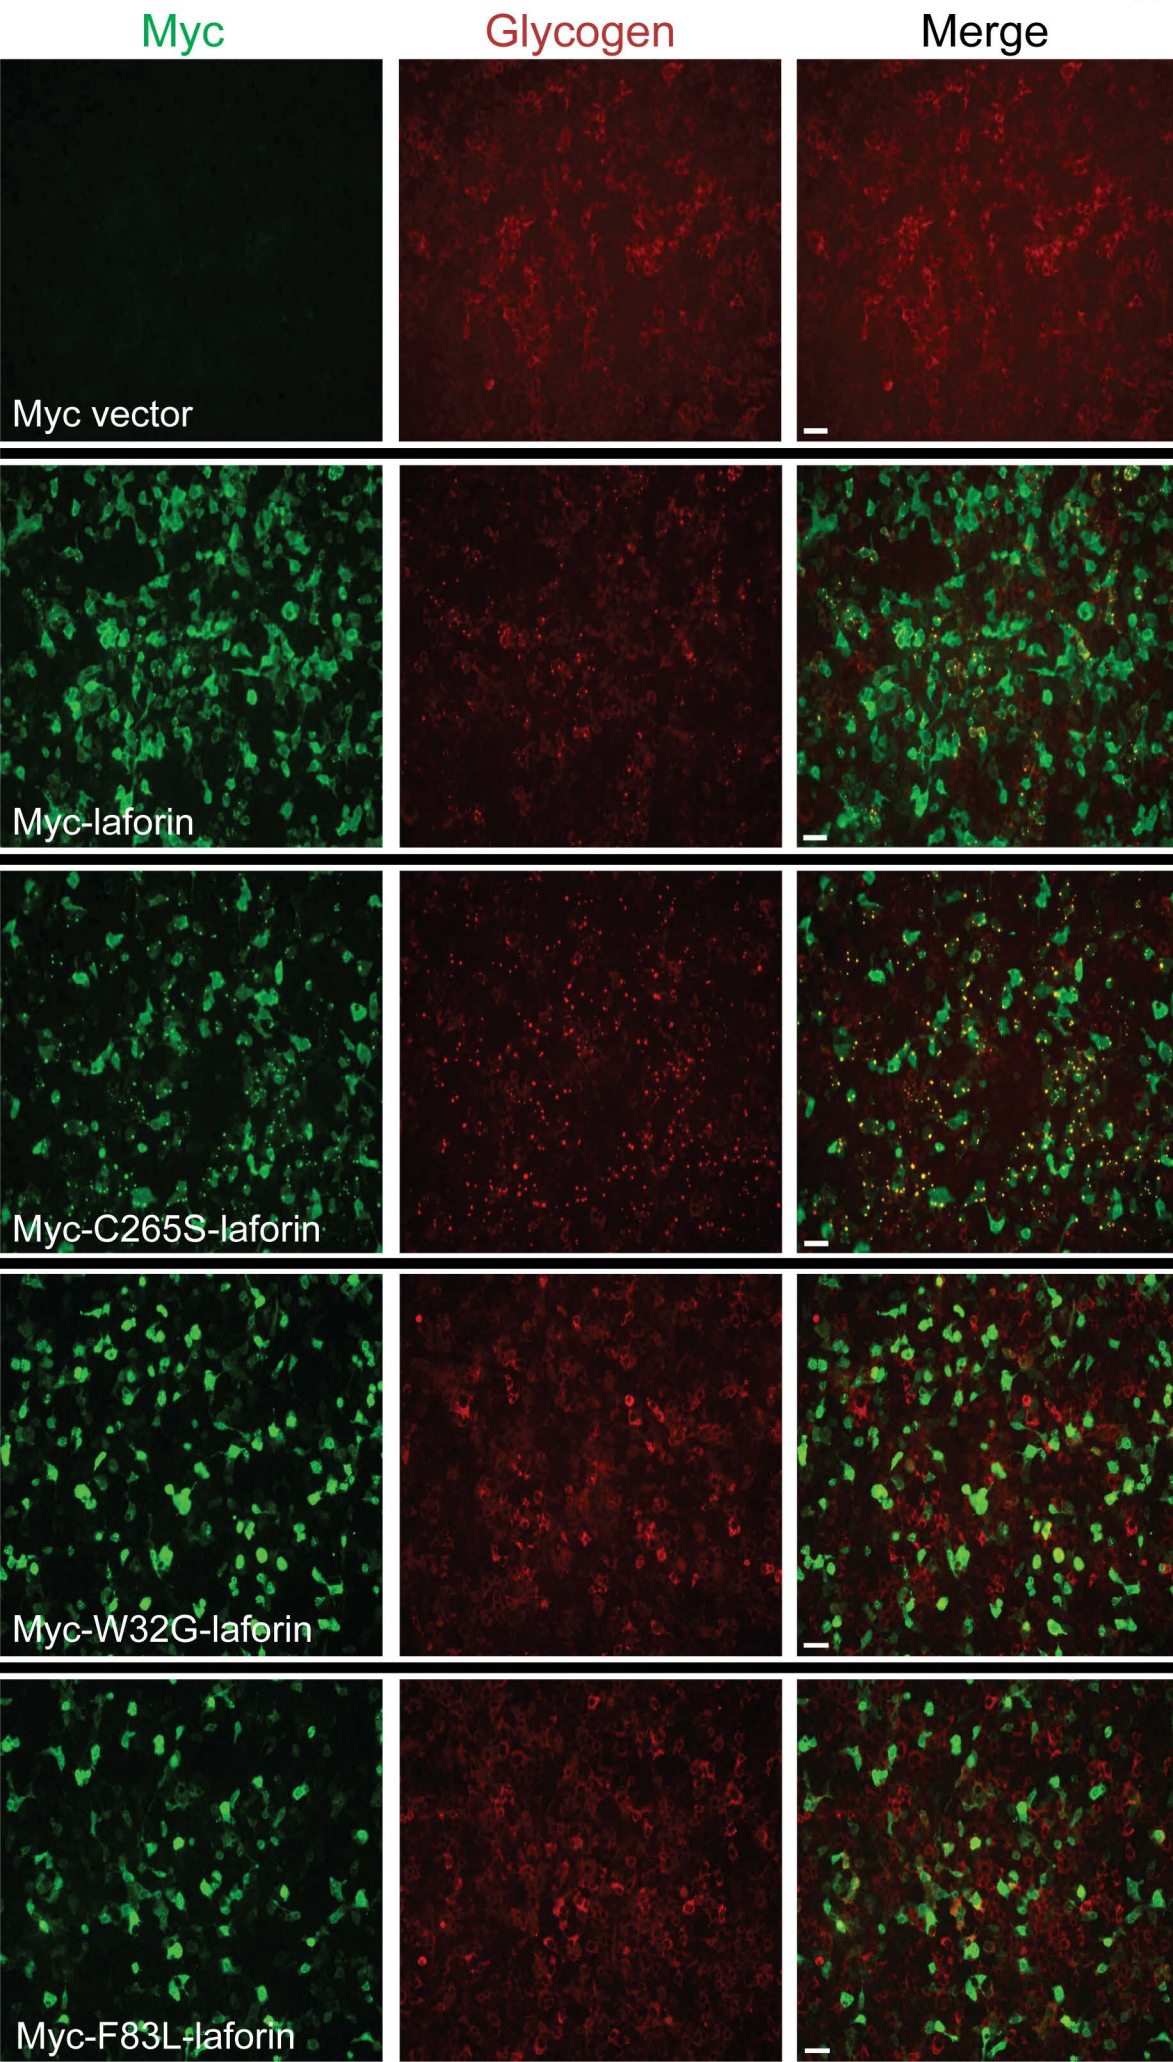

Supplement: supp_M111.331611_jbc.M111.331611-1.pdf [file supp_M111.331611_jbc.M111.331611-1.pdf]
